# Supplementary material for: Subtypes and Mechanisms of Hypertrophic Cardiomyopathy Proposed by Machine Learning Algorithms
Source: MDPI journal article supplement (doi:10.3390/life12101566), 2022-10-09
Supplement: s1 [file s1]

**Table S1.** An approximate interpretation of clustering—feature importance

| Feature           | Feature importance |
|-------------------|--------------------|
| LDH               | 0.072933           |
| AO                | 0.063513           |
| AOvs              | 0.053407           |
| PLWd              | 0.042644           |
| LVOT Vmax         | 0.039411           |
| MVmeanPG          | 0.034072           |
| MVmaxPG           | 0.032063           |
| Peak VE/VCO2      | 0.031522           |
| Heart murmur      | 0.027068           |
| AV maxPG          | 0.026379           |
| AscAO             | 0.024348           |
| HCM*              | 0.024280           |
| Albumin           | 0.023722           |
| Weight            | 0.017189           |
| LVOT maxPG        | 0.017161           |
| MVVTI             | 0.015820           |
| AV meanPG         | 0.014308           |
| RVSP              | 0.014291           |
| NYHA class        | 0.013766           |
| AV Vmax           | 0.013508           |
| LA                | 0.013420           |
| AVVTI             | 0.013285           |
| BMI               | 0.013265           |
| LAV               | 0.013225           |
| Diastolic         | 0.013080           |
| LAVs              | 0.012232           |
| QRS duration      | 0.011427           |
| LVIDd             | 0.011076           |
| Calcium           | 0.010857           |
| NT-BNP            | 0.009222           |
| AVA by planimetry | 0.009159           |

|                                |          |
|--------------------------------|----------|
| E/E'                           | 0.009069 |
| RAVs                           | 0.008986 |
| EFLV                           | 0.008804 |
| Creatinine                     | 0.008517 |
| LVOT maxPG (Valsalva maneuver) | 0.008415 |
| Heart rate                     | 0.008279 |
| LDL                            | 0.007798 |
| Age                            | 0.007743 |
| IVSd                           | 0.007711 |
| Sokolow index                  | 0.007636 |
| MR                             | 0.007281 |
| Peak HR                        | 0.006946 |
| Anaerobic threshold            | 0.006793 |
| ESVLV                          | 0.006754 |

---

\*In family history
